# Supplementary material for: Resolving heterogeneous fluxes from tundra halves the growing season carbon budget
Source: Copernicus journal article supplement (doi:10.5194/bg-21-1301-2024), 2024-03-18
Supplement: Supplementary file 1 [file bg-21-1301-2024-supplement.pdf]

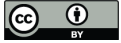

*Supplement of*

## **Resolving heterogeneous fluxes from tundra halves the growing season carbon budget**

**Sarah M. Ludwig et al.**

*Correspondence to:* Sarah M. Ludwig ([ludda.ludwig@columbia.edu](mailto:ludda.ludwig@columbia.edu))

The copyright of individual parts of the supplement might differ from the article licence.

Tables S1 – S3 include prior distribution information following the format used in JAGS. Those reported here include normal distributions ‘dnorm’ with parameters mean and standard deviation, and uniform distributions ‘dunif’ with parameters minimum and maximum range.

Table S1. Prior distributions and initial values for CH<sub>4</sub> flux un-mixing. The same values were used for each month of the growing season.

| Landcover category          | Prior distribution | Chain 1 initial values | Chain 2 initial values | Chain 3 initial values |
|-----------------------------|--------------------|------------------------|------------------------|------------------------|
| Lichen tundra               | dnorm(0,1e05)      | 9e-04                  | 1e-03                  | 2e-03                  |
| Shrub tundra                | dnorm(0,1e05)      | 9e-04                  | 1e-03                  | 2e-03                  |
| Sedge tundra                | dnorm(0,1e05)      | 9e-04                  | 1e-03                  | 2e-03                  |
| Edge of degraded permafrost | dunif(0,0.5)       | 9e-03                  | 0.01                   | 0.02                   |
| Degraded permafrost         | dunif(0,0.5)       | 9e-03                  | 0.01                   | 0.02                   |
| Wetland                     | dunif(0,0.5)       | 9e-03                  | 0.01                   | 0.02                   |
| Water                       | dunif(0,0.5)       | 9e-03                  | 0.01                   | 0.02                   |

Table S2. Prior distributions and initial values for NEE flux un-mixing for the simple landcover map. The same values were used for each month of the growing season, with the exception of August and September there were no GPP parameters (E0, Pmax) for degraded permafrost.

| Landcover category  | Parameter            | Prior distribution | Chain 1 initial values | Chain 2 initial values | Chain 3 initial values |
|---------------------|----------------------|--------------------|------------------------|------------------------|------------------------|
| Tundra              | alpha                | dnorm(1,1)         | 0.9                    | 1                      | 1.1                    |
| Tundra              | beta                 | dnorm(0.08,2)      | 0.0255                 | 0.03                   | 0.04                   |
| Tundra              | E0                   | dunif(0,0.25)      | 0.005                  | 0.03038                | 0.13045                |
| Tundra              | Pmax                 | dunif(0,50)        | 5.31                   | 14.33                  | 27.5                   |
| Degraded permafrost | alpha                | dnorm(1,1)         | 0.9                    | 1                      | 1.1                    |
| Degraded permafrost | beta                 | dnorm(0.08,2)      | 0.068                  | 0.08                   | 0.16                   |
| Degraded permafrost | E0                   | dunif(0,0.25)      | 0.005                  | 0.01                   | 0.13045                |
| Degraded permafrost | Pmax                 | dunif(0,75)        | 5.90                   | 15                     | 25                     |
| Wetland             | alpha                | dnorm(1,1)         | 0.9                    | 1                      | 1.1                    |
| Wetland             | beta                 | dnorm(0.08,2)      | 0.085                  | 0.09                   | 0.096                  |
| Wetland             | E0                   | dunif(0,0.25)      | 0.005                  | 0.03038                | 0.13045                |
| Wetland             | Pmax                 | dunif(0,50)        | 5.31                   | 14.33                  | 27.5                   |
| Water               | CO <sub>2</sub> flux | dnorm(0.5,0.01)    | 0.45                   | 2                      | 5.5                    |

Table S3. Prior distributions and initial values for NEE flux un-mixing for the complex landcover map. The same values were used for each month of the growing season, with the exception of August and September there were no GPP parameters (E0, Pmax) for degraded permafrost.

| Landcover category  | Parameter            | Prior distribution | Chain 1 initial values | Chain 2 initial values | Chain 3 initial values |
|---------------------|----------------------|--------------------|------------------------|------------------------|------------------------|
| Lichen tundra       | alpha                | dnorm(1,1)         | 0.9                    | 1                      | 1.1                    |
| Lichen tundra       | beta                 | dnorm(0.08,2)      | 0.036                  | 0.04                   | 0.044                  |
| Lichen tundra       | E0                   | dunif(0,0.25)      | 0.00117                | 0.03038                | 0.1434                 |
| Lichen tundra       | Pmax                 | dunif(0,35)        | 5.31                   | 14.33                  | 25                     |
| Shrub tundra        | alpha                | dnorm(1,1)         | 0.9                    | 1                      | 1.1                    |
| Shrub tundra        | beta                 | dnorm(0.08,2)      | 0.072                  | 0.08                   | 0.088                  |
| Shrub tundra        | E0                   | dunif(0,0.25)      | 0.00117                | 0.03038                | 0.13038                |
| Shrub tundra        | Pmax                 | dunif(0,35)        | 5.31                   | 14.33                  | 25                     |
| Sedge tundra        | alpha                | dnorm(1,1)         | 0.9                    | 1                      | 1.1                    |
| Sedge tundra        | beta                 | dnorm(0.08,2)      | 0.03                   | 0.045                  | 0.01                   |
| Sedge tundra        | E0                   | dunif(0,0.25)      | 0.00117                | 0.03038                | 0.1434                 |
| Sedge tundra        | Pmax                 | dunif(0,35)        | 5.31                   | 14.33                  | 25                     |
| Edge of degraded    | alpha                | dnorm(1,1)         | 0.9                    | 1                      | 1.1                    |
| Edge of degraded    | beta                 | dnorm(0.08,2)      | 0.027                  | 0.03                   | 0.033                  |
| Edge of degraded    | E0                   | dunif(0,0.25)      | 0.00117                | 0.013045               | 0.1434                 |
| Edge of degraded    | Pmax                 | dunif(0,75)        | 5.31                   | 14.33                  | 25                     |
| Degraded permafrost | alpha                | dnorm(1,1)         | 0.9                    | 1                      | 1.1                    |
| Degraded permafrost | beta                 | dnorm(0.08,2)      | 0.072                  | 0.08                   | 0.088                  |
| Degraded permafrost | E0                   | dunif(0,0.25)      | 0.00117                | 0.013045               | 0.1                    |
| Degraded permafrost | Pmax                 | dunif(0,75)        | 5.31                   | 14.33                  | 25                     |
| Wetland             | alpha                | dnorm(1,1)         | 0.9                    | 1                      | 1.1                    |
| Wetland             | beta                 | dnorm(0.08,2)      | 0.063                  | 0.01                   | 0.055                  |
| Wetland             | E0                   | dunif(0,0.25)      | 0.00117                | 0.013045               | 0.1434                 |
| Wetland             | Pmax                 | dunif(0,25)        | 5.31                   | 14.33                  | 25                     |
| Water               | CO <sub>2</sub> flux | dnorm(0.5,0.01)    | 1.8                    | 2                      | 2.2                    |

Table S4. Lichen tundra parameter posterior estimations, mean (sd), for carbon fluxes from the complex map.

| Footprint model   | Parameter            | May                  | June                | July                 | August              | September            |
|-------------------|----------------------|----------------------|---------------------|----------------------|---------------------|----------------------|
| Hsieh             | alpha                | 0.353<br>(0.237)     | 0.774<br>(0.379)    | 0.39<br>(0.271)      | 0.98<br>(0.357)     | 0.287<br>(0.206)     |
| Hsieh             | beta                 | 0.0577<br>(0.0365)   | 0.0392<br>(0.0273)  | 0.0582<br>(0.0405)   | 0.0477<br>(0.0283)  | 0.11<br>(0.0588)     |
| Hsieh             | E0                   | 0.0654<br>(0.0793)   | 0.0329<br>(0.0365)  | 0.0275<br>(0.0118)   | 0.0432<br>(0.029)   | 0.374<br>(0.216)     |
| Hsieh             | Pmax                 | 6.3 (7.88)           | 10.1 (5.86)         | 16.5 (6.15)          | 11.9 (4.73)         | 3.2 (2.83)           |
| Hsieh             | CH <sub>4</sub> flux | 0.00878<br>(0.0025)  | 0.00558<br>(0.0027) | 0.00609<br>(0.00256) | 0.0128<br>(0.00256) | 0.00761<br>(0.00289) |
| Kljun             | alpha                | 0.276<br>(0.199)     | 0.995<br>(0.398)    | 0.634<br>(0.336)     | 1.33<br>(0.374)     | 0.325<br>(0.227)     |
| Kljun             | beta                 | 0.0553<br>(0.0365)   | 0.0418<br>(0.0264)  | 0.0474<br>(0.0306)   | 0.0413<br>(0.0246)  | 0.0984<br>(0.057)    |
| Kljun             | E0                   | 0.0314<br>(0.0593)   | 0.0314<br>(0.0253)  | 0.0339<br>(0.0127)   | 0.0485<br>(0.0267)  | 0.315<br>(0.224)     |
| Kljun             | Pmax                 | 9.95 (8.15)          | 11.2 (5.22)         | 16.2 (5.01)          | 10.6 (3.69)         | 3.82 (2.95)          |
| Kljun             | CH <sub>4</sub> flux | 0.00848<br>(0.00247) | 0.0032<br>(0.00279) | 0.0117<br>(0.00273)  | 0.0151<br>(0.0027)  | 0.00638<br>(0.00292) |
| Kormann & Meixner | alpha                | 0.302<br>(0.223)     | 0.595<br>(0.35)     | 0.5 (0.308)          | 1.17<br>(0.332)     | 0.261<br>(0.201)     |
| Kormann & Meixner | beta                 | 0.0517<br>(0.0362)   | 0.0443<br>(0.0306)  | 0.0468<br>(0.0328)   | 0.0694<br>(0.0234)  | 0.0885<br>(0.0595)   |
| Kormann & Meixner | E0                   | 0.0122<br>(0.0348)   | 0.0535<br>(0.0501)  | 0.0297<br>(0.0125)   | 0.0621<br>(0.0253)  | 0.376 (0.21)         |
| Kormann & Meixner | Pmax                 | 12.4 (7.5)           | 7.03 (4.51)         | 13 (4.09)            | 12.6 (2.81)         | 3.44 (1.33)          |
| Kormann & Meixner | CH <sub>4</sub> flux | 0.00666<br>(0.00223) | 0.00592<br>(0.0026) | 0.00852<br>(0.00252) | 0.012<br>(0.00252)  | 0.00765<br>(0.00278) |

Table S5. Shrub tundra parameter posterior estimations, mean (sd), for carbon fluxes from the complex map.

| Footprint model   | Parameter            | May                   | June                 | July                 | August               | September             |
|-------------------|----------------------|-----------------------|----------------------|----------------------|----------------------|-----------------------|
| Hsieh             | alpha                | 1.25<br>(0.377)       | 0.518<br>(0.309)     | 0.61<br>(0.299)      | 0.592<br>(0.354)     | 0.651<br>(0.349)      |
| Hsieh             | beta                 | 0.0548<br>(0.0232)    | 0.0877<br>(0.0433)   | 0.0911<br>(0.033)    | 0.0501<br>(0.0345)   | 0.0422<br>(0.0343)    |
| Hsieh             | E0                   | 0.0162<br>(0.0205)    | 0.0235<br>(0.0137)   | 0.0961<br>(0.0406)   | 0.0467<br>(0.0293)   | 0.427<br>(0.209)      |
| Hsieh             | Pmax                 | 13.1 (5.93)           | 15.4 (4.74)          | 11 (2.24)            | 10.9 (3.05)          | 3.93 (2.05)           |
| Hsieh             | CH <sub>4</sub> flux | 0.00419<br>(0.00232)  | 0.0089<br>(0.00226)  | 0.00512<br>(0.00215) | 0.00411<br>(0.00239) | 0.00225<br>(0.0028)   |
| Kljun             | alpha                | 2.06<br>(0.391)       | 0.638<br>(0.366)     | 0.664<br>(0.377)     | 0.383<br>(0.294)     | 0.669<br>(0.366)      |
| Kljun             | beta                 | 0.0393<br>(0.0184)    | 0.0533<br>(0.035)    | 0.0522<br>(0.035)    | 0.053<br>(0.0405)    | 0.0441<br>(0.0352)    |
| Kljun             | E0                   | 0.0405<br>(0.0435)    | 0.0354<br>(0.0378)   | 0.0985<br>(0.0429)   | 0.0511<br>(0.0521)   | 0.442<br>(0.203)      |
| Kljun             | Pmax                 | 8.05 (6.83)           | 6.38 (5.99)          | 12.3 (3.01)          | 10.1 (6.91)          | 6.04 (2.84)           |
| Kljun             | CH <sub>4</sub> flux | 0.000657<br>(0.00301) | 0.00269<br>(0.00285) | -6e-04<br>(0.00282)  | 0.00199<br>(0.00297) | 0.000665<br>(0.00299) |
| Kormann & Meixner | alpha                | 1.43<br>(0.365)       | 0.765<br>(0.375)     | 1.39<br>(0.374)      | 2.08<br>(0.391)      | 0.635<br>(0.324)      |
| Kormann & Meixner | beta                 | 0.0539<br>(0.0222)    | 0.0551<br>(0.0328)   | 0.0644<br>(0.0229)   | 0.0516<br>(0.0201)   | 0.0381<br>(0.0318)    |
| Kormann & Meixner | E0                   | 0.00806<br>(0.00524)  | 0.0481<br>(0.0215)   | 0.0755<br>(0.0243)   | 0.0718<br>(0.0228)   | 0.45 (0.193)          |
| Kormann & Meixner | Pmax                 | 16 (5.52)             | 13.7 (3.31)          | 15.9 (2.79)          | 16.7 (2.85)          | 4.18 (1.43)           |
| Kormann & Meixner | CH <sub>4</sub> flux | 0.00326<br>(0.00243)  | 0.00572<br>(0.00251) | 0.00902<br>(0.00238) | 0.00635<br>(0.00264) | 0.00473<br>(0.00283)  |

Table S6. Sedge tundra parameter posterior estimations, mean (sd), for carbon fluxes from the complex map.

| Footprint model   | Parameter            | May                   | June                 | July                 | August               | September            |
|-------------------|----------------------|-----------------------|----------------------|----------------------|----------------------|----------------------|
| Hsieh             | alpha                | 1.81<br>(0.138)       | 1.34<br>(0.274)      | 1.81 (0.3)           | 2.45<br>(0.308)      | 1.46 (0.279)         |
| Hsieh             | beta                 | 0.0234<br>(0.0121)    | 0.0705<br>(0.0156)   | 0.0475<br>(0.0142)   | 0.0452<br>(0.00819)  | 0.0354<br>(0.0199)   |
| Hsieh             | E0                   | 0.0174<br>(0.0063)    | 0.03<br>(0.00882)    | 0.0481<br>(0.00974)  | 0.0641<br>(0.0156)   | 0.0425<br>(0.0242)   |
| Hsieh             | Pmax                 | 10.2 (2.53)           | 12.5 (2.26)          | 12.9 (1.61)          | 12.2 (1.33)          | 8.9 (2.46)           |
| Hsieh             | CH <sub>4</sub> flux | 0.0061<br>(0.00133)   | 0.0113<br>(0.00142)  | 0.00386<br>(0.00125) | 0.00568<br>(0.00148) | 0.00957<br>(0.0021)  |
| Kljun             | alpha                | 1.54<br>(0.136)       | 1.23<br>(0.271)      | 1.99<br>(0.301)      | 2.28<br>(0.328)      | 2.02 (0.282)         |
| Kljun             | beta                 | 0.0322<br>(0.015)     | 0.0605<br>(0.0222)   | 0.0463<br>(0.015)    | 0.0237<br>(0.015)    | 0.0205<br>(0.0132)   |
| Kljun             | E0                   | 0.0196<br>(0.0103)    | 0.0333<br>(0.0102)   | 0.0407<br>(0.00952)  | 0.0385<br>(0.0112)   | 0.0319<br>(0.0432)   |
| Kljun             | Pmax                 | 13.3 (4.87)           | 14.9 (2.93)          | 14.6 (2.02)          | 12.8 (2.76)          | 10.9 (6.29)          |
| Kljun             | CH <sub>4</sub> flux | 0.000888<br>(0.00245) | 0.00467<br>(0.00197) | 0.00701<br>(0.00178) | 0.00902<br>(0.00223) | 0.0016<br>(0.00268)  |
| Kormann & Meixner | alpha                | 2.03<br>(0.135)       | 1.52<br>(0.264)      | 1.7 (0.294)          | 2.67 (0.32)          | 1.97 (0.279)         |
| Kormann & Meixner | beta                 | 0.033<br>(0.0116)     | 0.0719<br>(0.0133)   | 0.0609<br>(0.00987)  | 0.0282<br>(0.0126)   | 0.018<br>(0.0122)    |
| Kormann & Meixner | E0                   | 0.0313<br>(0.0121)    | 0.0305<br>(0.00795)  | 0.0573<br>(0.0109)   | 0.0559<br>(0.0139)   | 0.026<br>(0.0133)    |
| Kormann & Meixner | Pmax                 | 10.6 (1.85)           | 14.9 (2.45)          | 13.5 (1.41)          | 11.3 (1.4)           | 12.6 (4.39)          |
| Kormann & Meixner | CH <sub>4</sub> flux | 0.00658<br>(0.00179)  | 0.00976<br>(0.00168) | 0.004<br>(0.0014)    | 0.00607<br>(0.00175) | 0.00831<br>(0.00231) |

Table S7. Edge of degraded tundra parameter posterior estimations, mean (sd), for carbon fluxes from the complex map.

| Footprint model   | Parameter            | May                 | June                | July                | August              | September           |
|-------------------|----------------------|---------------------|---------------------|---------------------|---------------------|---------------------|
| Hsieh             | alpha                | 1.39<br>(0.443)     | 2.3 (0.49)          | 2.31<br>(0.522)     | 2.58<br>(0.485)     | 2.36 (0.36)         |
| Hsieh             | beta                 | 0.054<br>(0.0283)   | 0.0608<br>(0.0222)  | 0.0547<br>(0.0213)  | 0.0424<br>(0.021)   | 0.0446<br>(0.0193)  |
| Hsieh             | E0                   | 0.0347<br>(0.0169)  | 0.0739<br>(0.0167)  | 0.035<br>(0.00794)  | 0.0405<br>(0.0161)  | 0.0345<br>(0.0295)  |
| Hsieh             | Pmax                 | 19.7 (4.01)         | 41.5 (3.13)         | 54.7 (12.3)         | 32.5 (12.3)         | 29.6 (10.4)         |
| Hsieh             | CH <sub>4</sub> flux | 0.0185<br>(0.00558) | 0.0251<br>(0.00582) | 0.0324<br>(0.00453) | 0.0543<br>(0.00501) | 0.0547<br>(0.00788) |
| Kljun             | alpha                | 1.34<br>(0.521)     | 2.38<br>(0.516)     | 2.2 (0.555)         | 2.84 (0.5)          | 1.34 (0.543)        |
| Kljun             | beta                 | 0.0496<br>(0.0253)  | 0.0774<br>(0.0197)  | 0.0537<br>(0.0218)  | 0.0717<br>(0.0167)  | 0.0647<br>(0.0389)  |
| Kljun             | E0                   | 0.0432<br>(0.0517)  | 0.0611<br>(0.027)   | 0.0527<br>(0.023)   | 0.0936<br>(0.0336)  | 0.0541<br>(0.0373)  |
| Kljun             | Pmax                 | 14.1 (6.7)          | 30.2 (8.33)         | 18.6 (7.25)         | 25.1 (6.15)         | 26.3 (10.7)         |
| Kljun             | CH <sub>4</sub> flux | 0.0241<br>(0.00754) | 0.0483<br>(0.00665) | 0.0247<br>(0.00597) | 0.0406<br>(0.00732) | 0.0744<br>(0.00941) |
| Kormann & Meixner | alpha                | 1.02<br>(0.473)     | 1.95<br>(0.545)     | 1.77<br>(0.565)     | 1.18<br>(0.547)     | 1.46 (0.495)        |
| Kormann & Meixner | beta                 | 0.0527<br>(0.0306)  | 0.0614<br>(0.0258)  | 0.0322<br>(0.0202)  | 0.053<br>(0.0331)   | 0.0854<br>(0.0401)  |
| Kormann & Meixner | E0                   | 0.0425<br>(0.0593)  | 0.0529<br>(0.0185)  | 0.0211<br>(0.00689) | 0.0193<br>(0.013)   | 0.0439<br>(0.0406)  |
| Kormann & Meixner | Pmax                 | 12.9 (7.14)         | 35.5 (6.45)         | 43.8 (15.8)         | 40.7 (25)           | 22.8 (11.2)         |
| Kormann & Meixner | CH <sub>4</sub> flux | 0.015<br>(0.00614)  | 0.036<br>(0.00692)  | 0.0265<br>(0.0062)  | 0.0554<br>(0.00752) | 0.064<br>(0.0102)   |

Table S8. Degraded permafrost parameter posterior estimations, mean (sd), for carbon fluxes from the complex map.

| Footprint model   | Parameter            | May                | June                | July                 | August             | September          |
|-------------------|----------------------|--------------------|---------------------|----------------------|--------------------|--------------------|
| Hsieh             | alpha                | 1.11<br>(0.529)    | 0.811<br>(0.472)    | 1.57 (0.561)         | 1.23<br>(0.533)    | 0.644<br>(0.429)   |
| Hsieh             | beta                 | 0.0992<br>(0.0533) | 0.0805<br>(0.0476)  | 0.0609<br>(0.0336)   | 0.0883<br>(0.0464) | 0.104<br>(0.0714)  |
| Hsieh             | E0                   | 0.0749<br>(0.0427) | 0.0478<br>(0.0553)  | 0.0652<br>(0.041)    | NA                 | NA                 |
| Hsieh             | Pmax                 | 12.9<br>(7.02)     | 36.5 (28.2)         | 11.6 (6.81)          | NA                 | NA                 |
| Hsieh             | CH <sub>4</sub> flux | 0.051<br>(0.0263)  | 0.0179<br>(0.0124)  | 0.00686<br>(0.00623) | 0.0141<br>(0.0112) | 0.044<br>(0.025)   |
| Kljun             | alpha                | 1.11<br>(0.528)    | 0.997<br>(0.514)    | 1.64 (0.55)          | 0.796<br>(0.481)   | 0.879<br>(0.487)   |
| Kljun             | beta                 | 0.0965<br>(0.0498) | 0.0776<br>(0.0447)  | 0.0871<br>(0.0368)   | 0.0764<br>(0.0506) | 0.117<br>(0.0678)  |
| Kljun             | E0                   | 0.0756<br>(0.0428) | 0.088<br>(0.0537)   | 0.0804<br>(0.0585)   | NA                 | NA                 |
| Kljun             | Pmax                 | 12.5<br>(6.97)     | 52.9 (21.1)         | 30.4 (17.8)          | NA                 | NA                 |
| Kljun             | CH <sub>4</sub> flux | 0.0578<br>(0.0319) | 0.0117<br>(0.00991) | 0.00922<br>(0.00832) | 0.0153<br>(0.0131) | 0.0329<br>(0.0242) |
| Kormann & Meixner | alpha                | 1.01<br>(0.526)    | 0.813<br>(0.474)    | 1.21 (0.543)         | 0.724<br>(0.452)   | 0.703<br>(0.445)   |
| Kormann & Meixner | beta                 | 0.0899<br>(0.052)  | 0.0838<br>(0.0498)  | 0.0671<br>(0.0393)   | 0.095<br>(0.0577)  | 0.118<br>(0.0749)  |
| Kormann & Meixner | E0                   | 0.0813<br>(0.041)  | 0.0562<br>(0.0603)  | 0.0388<br>(0.0286)   | NA                 | NA                 |
| Kormann & Meixner | Pmax                 | 14.9<br>(6.74)     | 35.3 (28)           | 9.72 (7.13)          | NA                 | NA                 |
| Kormann & Meixner | CH <sub>4</sub> flux | 0.061<br>(0.0302)  | 0.0248<br>(0.0154)  | 0.0175<br>(0.0144)   | 0.037<br>(0.024)   | 0.0634<br>(0.0364) |



Table S9. Wetland parameter posterior estimations, mean (sd), for carbon fluxes from the complex map.

| Footprint model   | Parameter            | May                 | June                | July                | August              | September           |
|-------------------|----------------------|---------------------|---------------------|---------------------|---------------------|---------------------|
| Hsieh             | alpha                | 0.44<br>(0.293)     | 1.1 (0.528)         | 2.53<br>(0.449)     | 1.8 (0.484)         | 2.12 (0.437)        |
| Hsieh             | beta                 | 0.0715<br>(0.0446)  | 0.0415<br>(0.0294)  | 0.0688<br>(0.0123)  | 0.0483<br>(0.0249)  | 0.0362<br>(0.0214)  |
| Hsieh             | E0                   | 0.0376<br>(0.0435)  | 0.0662<br>(0.0582)  | 0.0539<br>(0.0532)  | 0.0441<br>(0.0553)  | 0.396<br>(0.216)    |
| Hsieh             | Pmax                 | 12 (6.23)           | 9.32 (5.73)         | 10.2 (6.32)         | 11.5 (7.99)         | 4.74 (2.77)         |
| Hsieh             | CH <sub>4</sub> flux | 0.0269<br>(0.00467) | 0.0219<br>(0.0065)  | 0.0604<br>(0.0068)  | 0.0768<br>(0.0058)  | 0.0369<br>(0.00722) |
| Kljun             | alpha                | 0.388<br>(0.297)    | 1.15<br>(0.549)     | 2.34<br>(0.453)     | 1.99<br>(0.513)     | 1.78 (0.45)         |
| Kljun             | beta                 | 0.0585<br>(0.0398)  | 0.0361<br>(0.0246)  | 0.079<br>(0.00672)  | 0.0559<br>(0.0219)  | 0.0481<br>(0.0294)  |
| Kljun             | E0                   | 0.046<br>(0.0537)   | 0.0945<br>(0.0626)  | 0.0593<br>(0.0347)  | 0.0521<br>(0.0396)  | 0.409<br>(0.213)    |
| Kljun             | Pmax                 | 11.1 (5.78)         | 7.2 (3.55)          | 13.8 (4.15)         | 13.7 (7.26)         | 5.13 (2.49)         |
| Kljun             | CH <sub>4</sub> flux | 0.0307<br>(0.00502) | 0.0282<br>(0.00646) | 0.0327<br>(0.00665) | 0.0514<br>(0.00608) | 0.0503<br>(0.00825) |
| Kormann & Meixner | alpha                | 0.374<br>(0.282)    | 1.04<br>(0.529)     | 2.34<br>(0.392)     | 1.38<br>(0.477)     | 1.85 (0.435)        |
| Kormann & Meixner | beta                 | 0.0592<br>(0.0417)  | 0.0368<br>(0.027)   | 0.0758<br>(0.00868) | 0.0509<br>(0.0274)  | 0.0436<br>(0.0269)  |
| Kormann & Meixner | E0                   | 0.0544<br>(0.0648)  | 0.0974<br>(0.0701)  | 0.0341<br>(0.0201)  | 0.035<br>(0.051)    | 0.401<br>(0.209)    |
| Kormann & Meixner | Pmax                 | 8.9 (5.94)          | 3.91 (2.99)         | 22.8 (10.4)         | 15.4 (14)           | 4.66 (2.01)         |
| Kormann & Meixner | CH <sub>4</sub> flux | 0.0241<br>(0.00437) | 0.0152<br>(0.00595) | 0.0461<br>(0.00653) | 0.0635<br>(0.00563) | 0.0283<br>(0.007)   |

Table S10. Water parameter posterior estimations, mean (sd), for carbon fluxes from the complex map.

| Footprint model   | Parameter            | May                | June               | July               | August             | September         |
|-------------------|----------------------|--------------------|--------------------|--------------------|--------------------|-------------------|
| Hsieh             | CO <sub>2</sub> flux | 1.82<br>(0.823)    | 2.52<br>(0.933)    | 2.23<br>(0.915)    | 2.98<br>(0.925)    | 2.02<br>(0.861)   |
| Hsieh             | CH <sub>4</sub> flux | 0.0291<br>(0.0124) | 0.0252<br>(0.0154) | 0.122<br>(0.0219)  | 0.0619<br>(0.0186) | 0.142<br>(0.0232) |
| Kljun             | CO <sub>2</sub> flux | 2.01<br>(0.853)    | 2.74<br>(0.939)    | 1.81<br>(0.863)    | 4.34<br>(0.936)    | 2.67<br>(0.913)   |
| Kljun             | CH <sub>4</sub> flux | 0.0414<br>(0.0124) | 0.0258<br>(0.0147) | 0.0651<br>(0.0195) | 0.0543<br>(0.0183) | 0.132<br>(0.0246) |
| Kormann & Meixner | CO <sub>2</sub> flux | 1.47<br>(0.735)    | 2.69<br>(0.943)    | 1.97<br>(0.885)    | 3.1 (0.914)        | 2.94<br>(0.883)   |
| Kormann & Meixner | CH <sub>4</sub> flux | 0.0361<br>(0.0101) | 0.0231<br>(0.0131) | 0.102<br>(0.0191)  | 0.0504<br>(0.0169) | 0.111<br>(0.0215) |

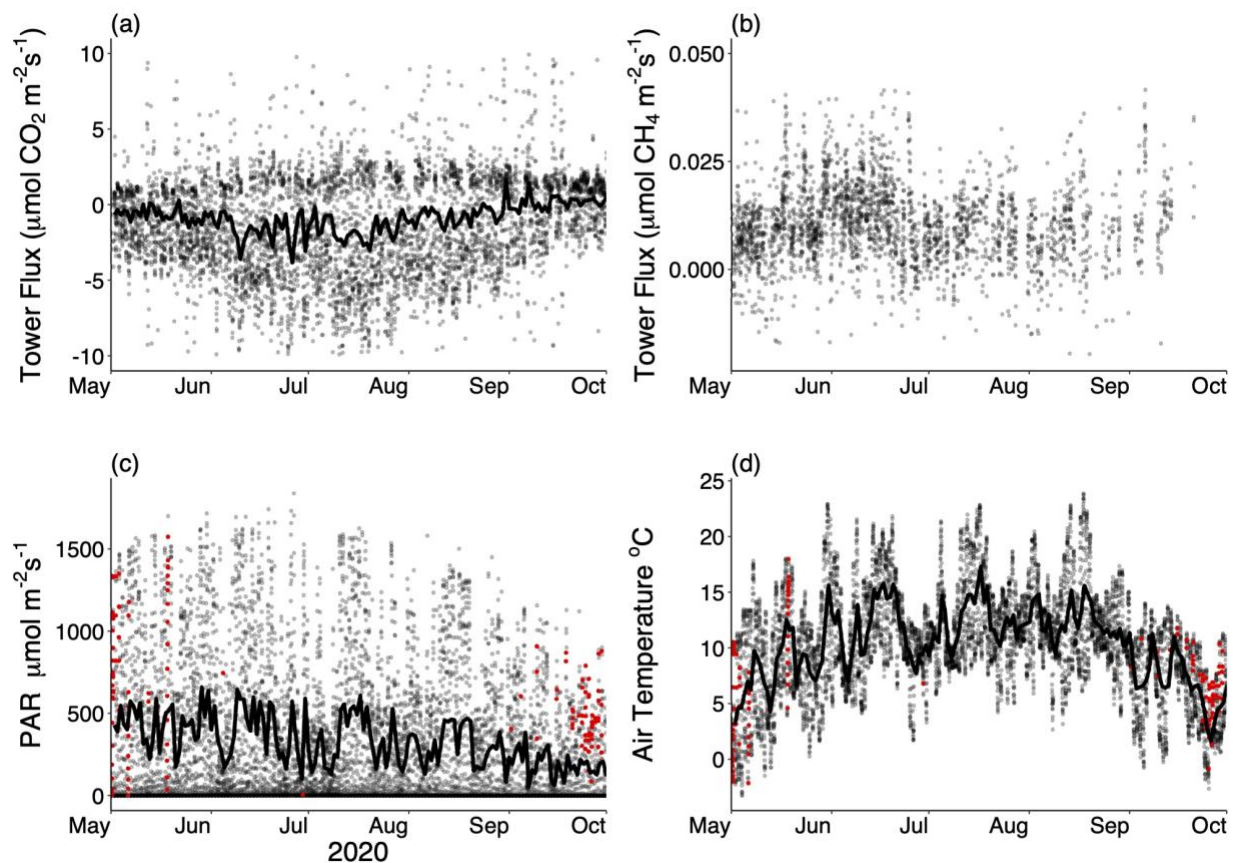

Figure S1. Timeseries of 2020 observations of CO<sub>2</sub> fluxes (a), CH<sub>4</sub> fluxes (b), air temperature (c), and PAR (d). The daily mean values are indicated with a black line. Red points in (c) and (d) are those drivers interpolated for use in monthly budget calculations.

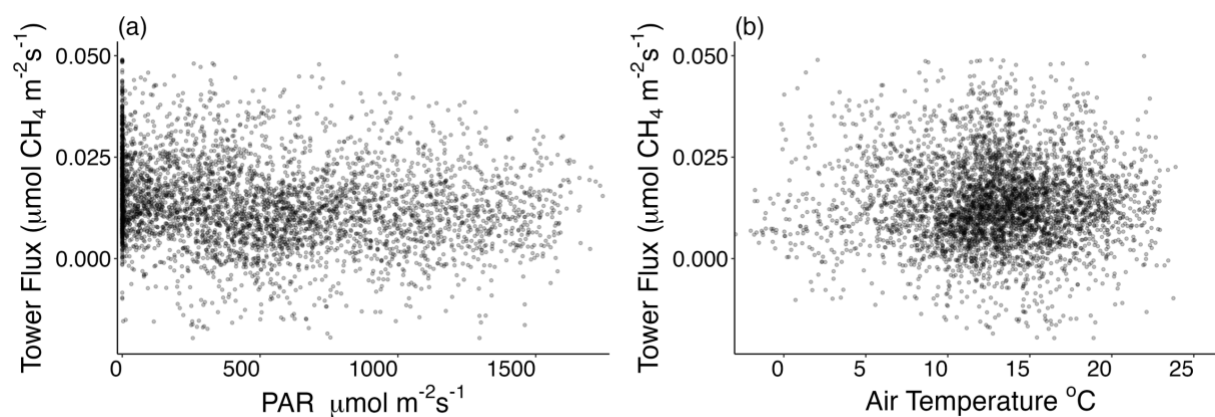

Figure S2. Methane fluxes from the 2020 growing season (May - September) as a function of PAR (a) and air temperature (b).

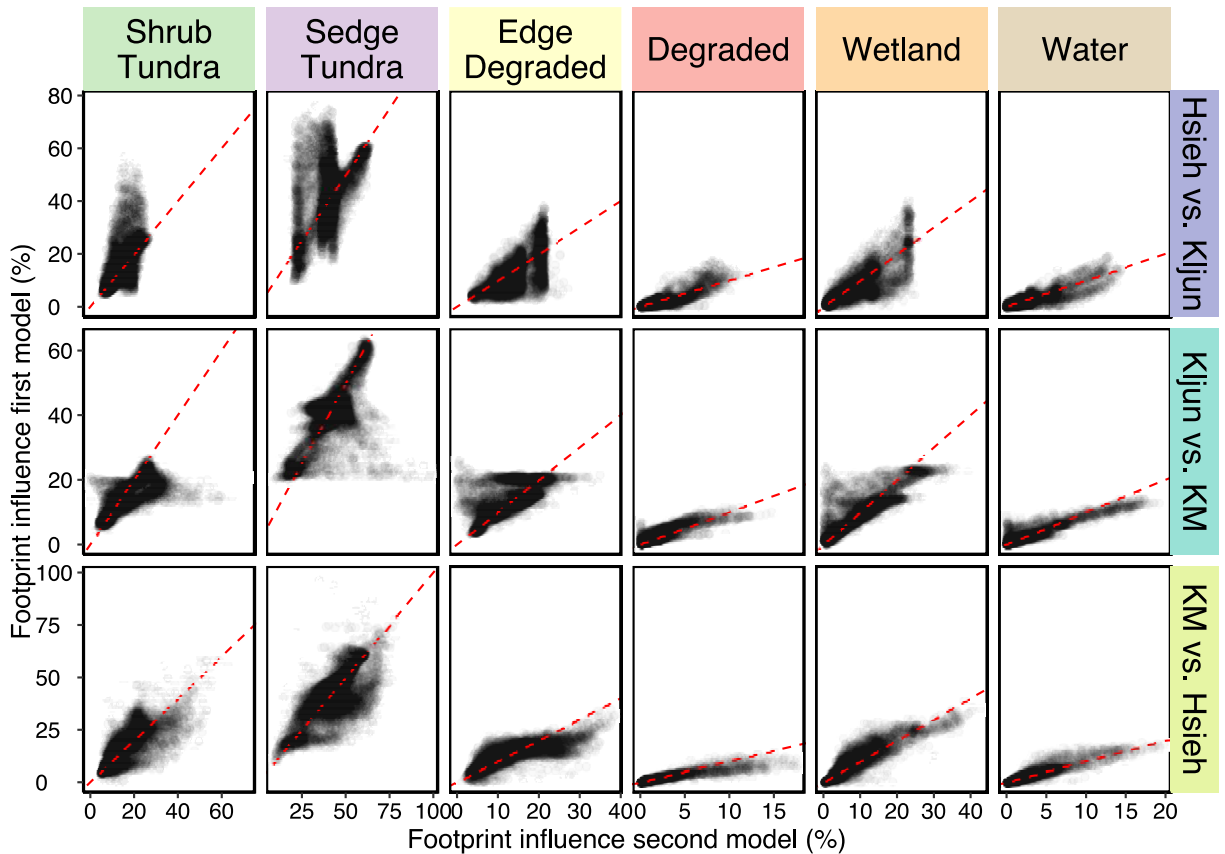

Figure S3. Footprint influences (%) summarized over landcovers for each flux observation. Top row shows Hsieh footprint influence (y-axis) against Kljun footprint influence (x-axis), middle row shows Kljun (y-axis) against Kormann & Meixner (x-axis), and bottom row shows Kormann & Meixner (y-axis) against Hsieh (x-axis). Columns show the summed footprint influence for landcovers from the complex version of the landcover map, which from left to right are; shrub tundra, sedge tundra, edge of degraded permafrost, fen, degraded permafrost, and surface water. Lichen tundra footprint influence comparisons can be found in the main text (Fig 2). The dashed red line indicates the 1:1 line.

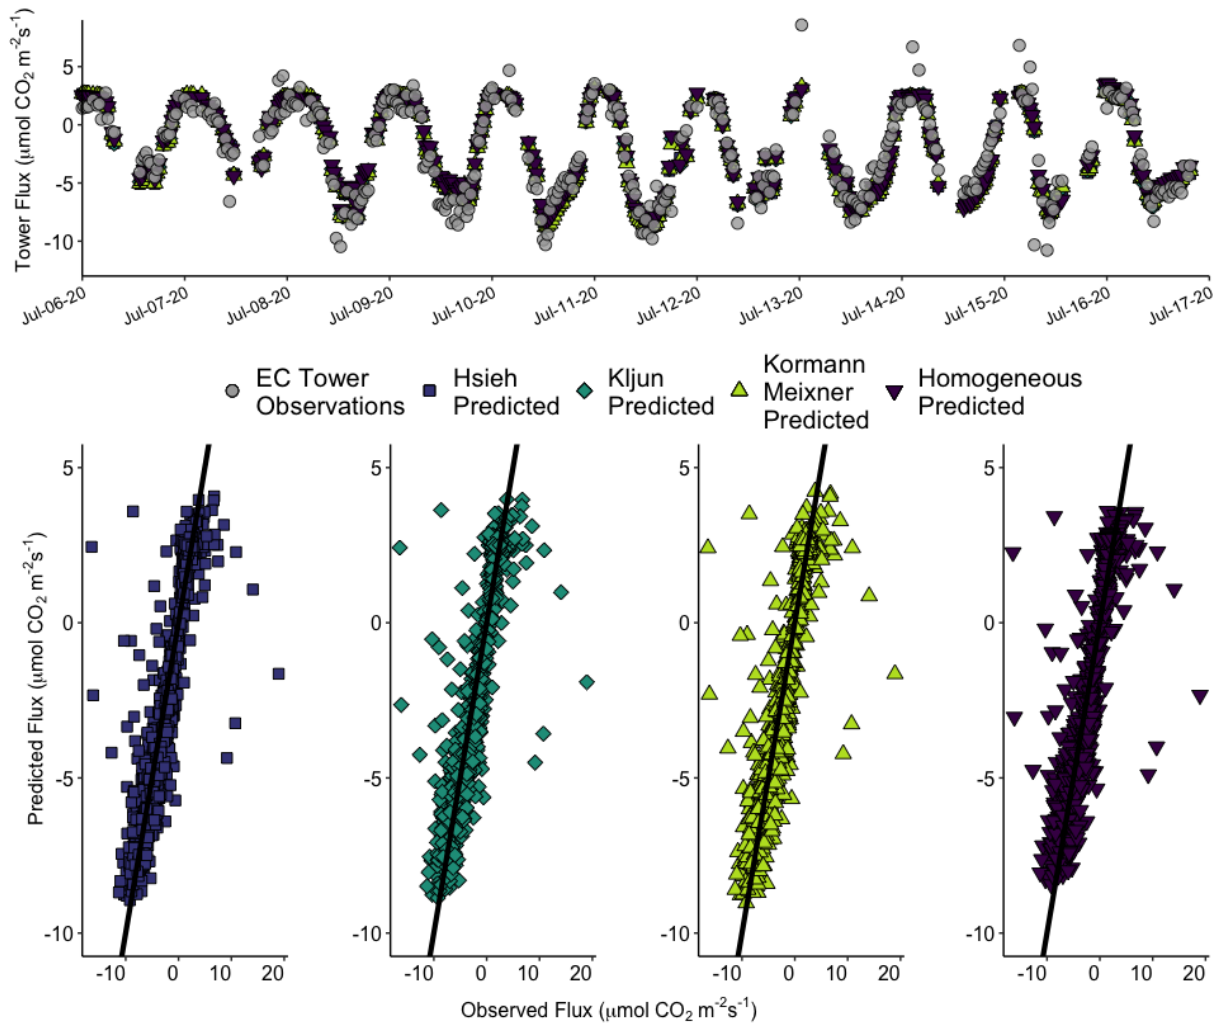

Figure S4. Top: example 10-day timeseries of eddy covariance tower 30-minute fluxes of  $\text{CO}_2$  observations and predictions from the homogeneous map and complex landcover map using Hsieh, Kljun, and Kormann and Meixner footprint models. Bottom: the entire month (July 2020) dataset of predicted vs. observed tower fluxes for the same set of models.

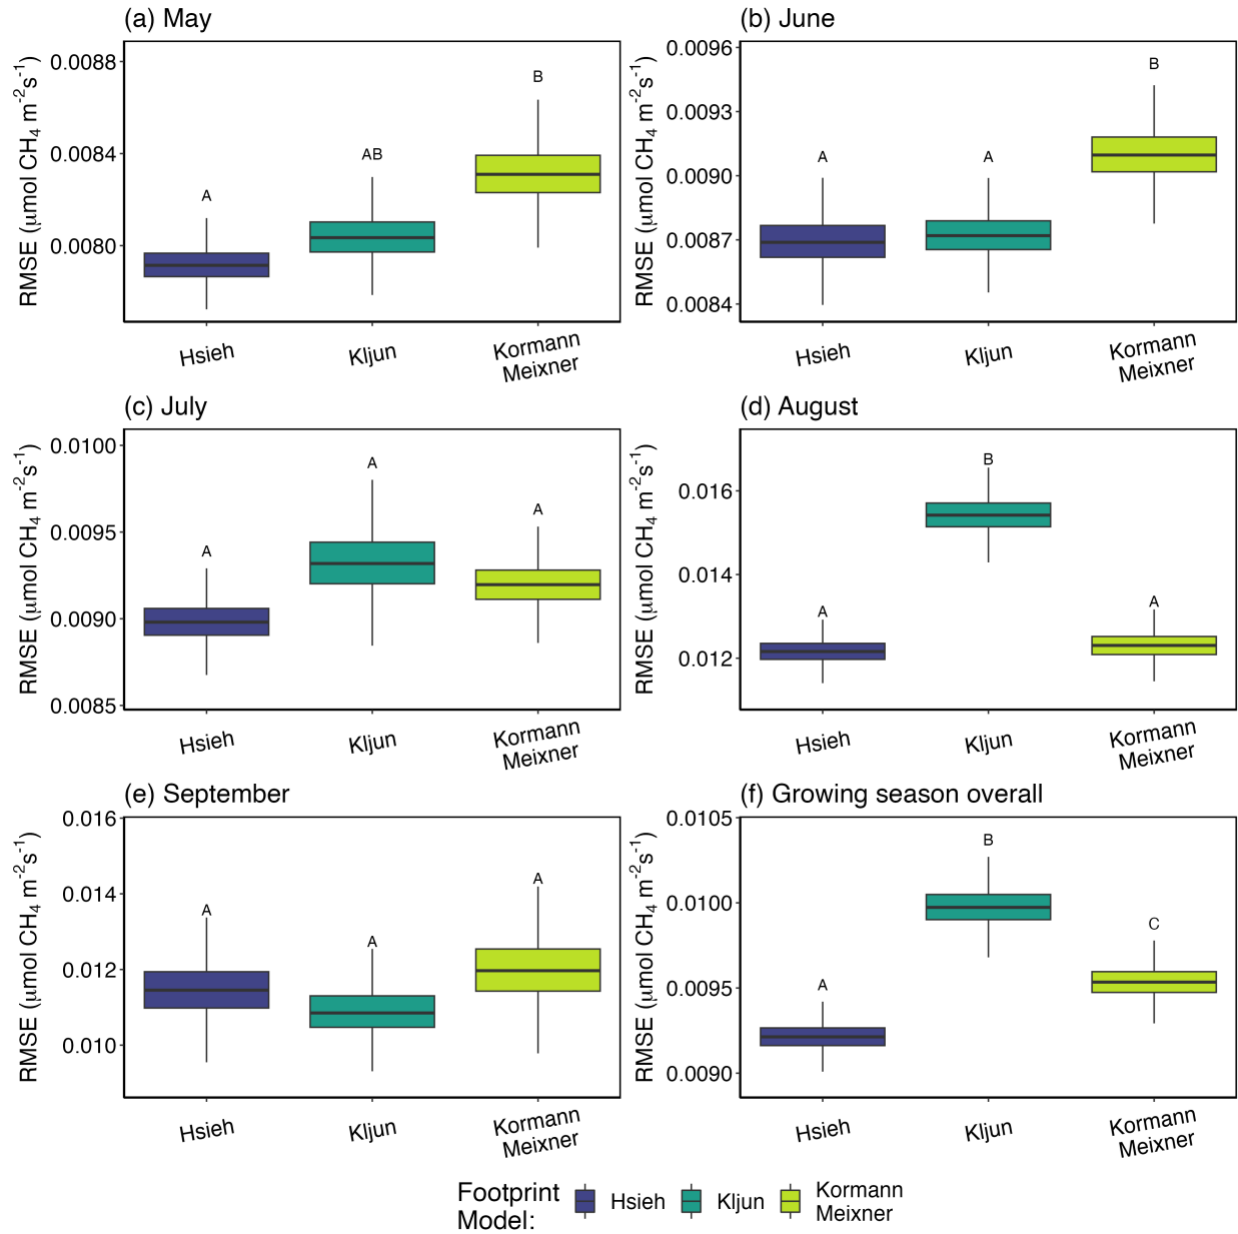

Figure S5. Monthly 2020 (a-e) and growing seasonal 2020 total (f) RMSE from artificial gap-filling  $\text{CH}_4$  fluxes. Boxes are the median and interquartile range (IQR), whiskers are  $1.5 \times \text{IQR}$ , for the Bayesian model gap-filling RMSE's. Distributions with non-overlapping Bayesian 89% credible intervals are designated with different letters.

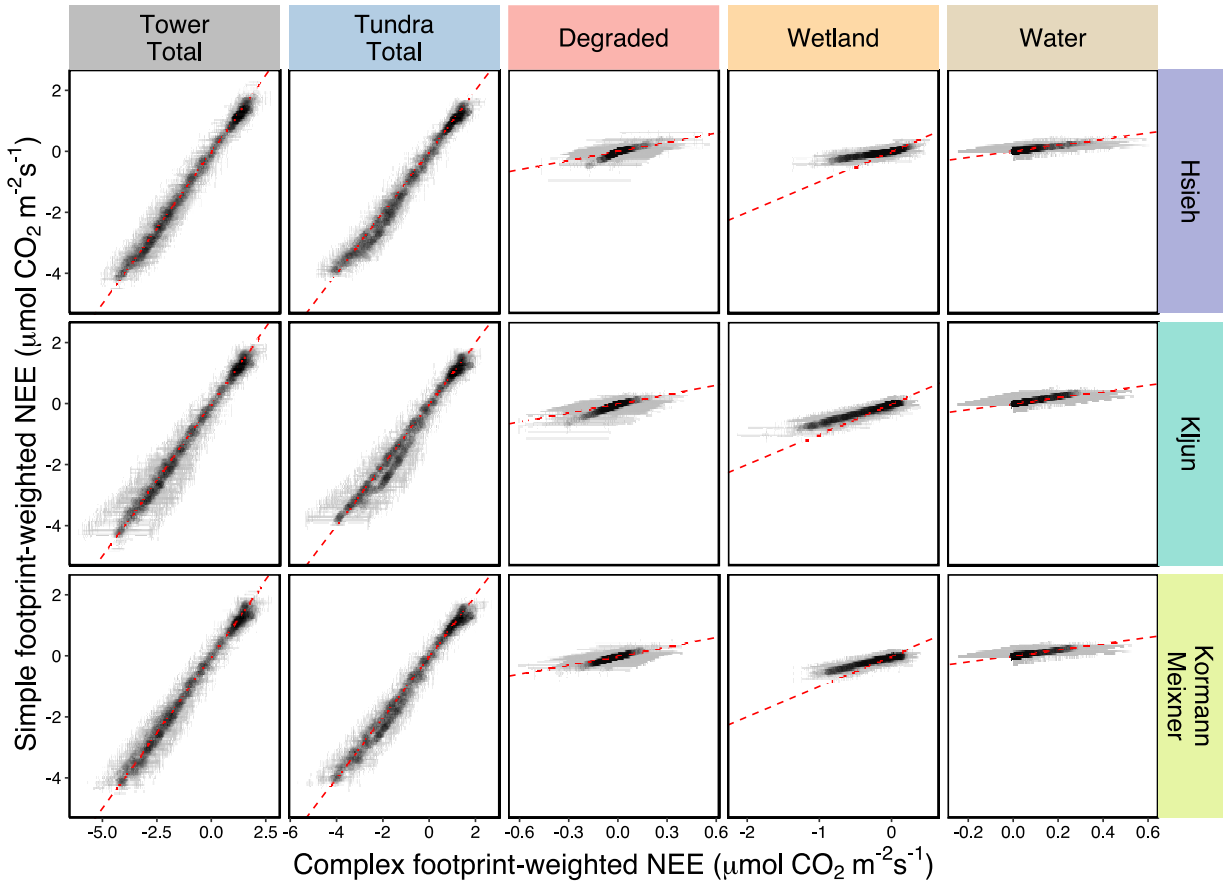

Figure S6. May 2020 median predicted net ecosystem exchange (NEE) for each landcover (simple landcover on the y-axis and complex on the x-axis) weighted by their respective footprint influence. The top row shows NEE predicted with and weighted by footprint influence from Hsieh model, the middle row uses Kljun footprint influence, and the bottom row uses footprint influence from Kormann & Meixner. The leftmost column shows tower total NEE, the linear combination of each predicted NEE weighted by its footprint influence. The next column shows tundra total NEE, the linear combination of lichen tundra, shrub tundra, sedge tundra, and tundra at the edge of degrading permafrost from the complex footprint-weighted NEE on the x-axis, compared to the simple map tundra footprint-weighted NEE on the y-axis. The columns continue with footprint-weighted NEE comparisons for fen, degraded permafrost, and surface water. The error bars show the inter-quartile range on predicted NEE. The dashed red lines indicate the 1:1 line.

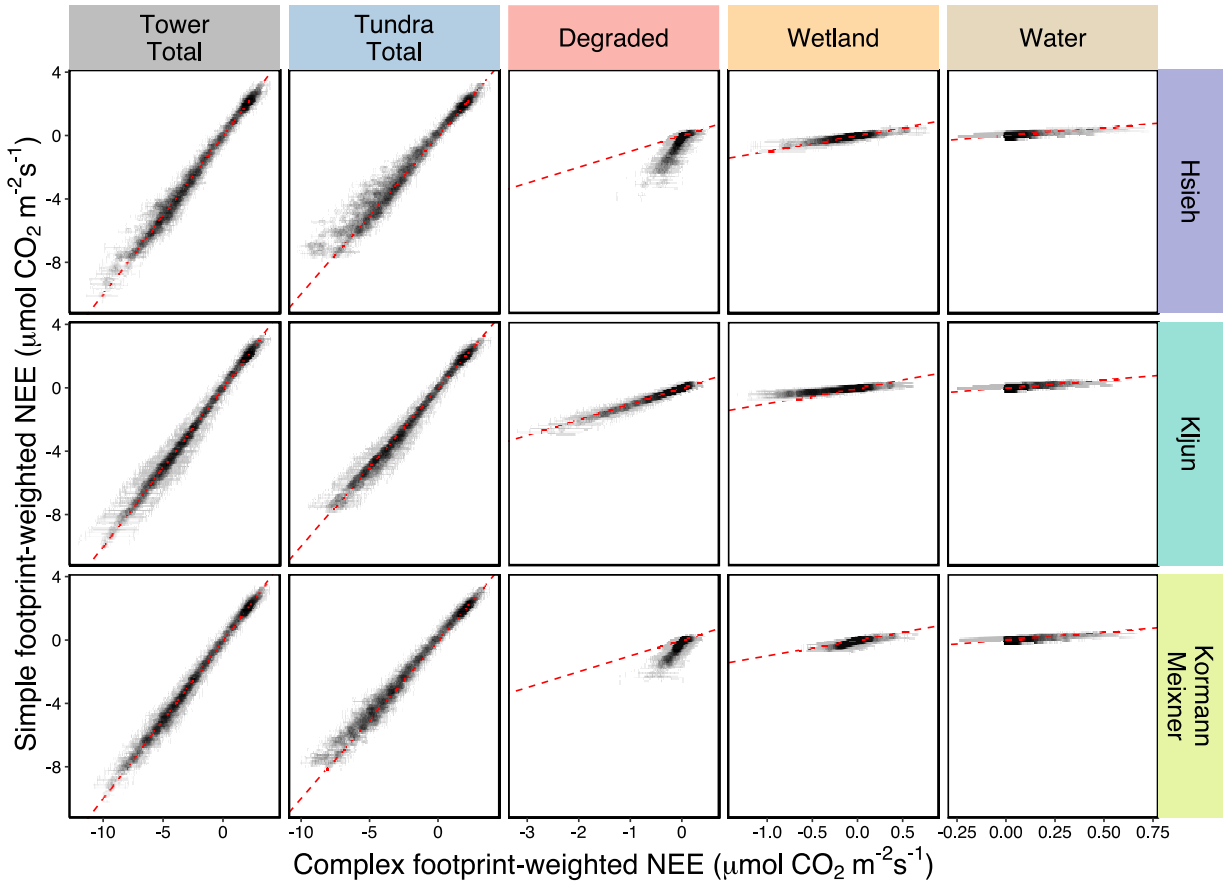

Figure S7. June 2020 median predicted net ecosystem exchange (NEE) for each landcover (simple landcover on the y-axis and complex on the x-axis) weighted by their respective footprint influence. The top row shows NEE predicted with and weighted by footprint influence from Hsieh model, the middle row uses Kljun footprint influence, and the bottom row uses footprint influence from Kormann & Meixner. The leftmost column shows tower total NEE, the linear combination of each predicted NEE weighted by its footprint influence. The next column shows tundra total NEE, the linear combination of lichen tundra, shrub tundra, sedge tundra, and tundra at the edge of degrading permafrost from the complex footprint-weighted NEE on the x-axis, compared to the simple map tundra footprint-weighted NEE on the y-axis. The columns continue with footprint-weighted NEE comparisons for fen, degraded permafrost, and surface water. The error bars show the inter-quartile range on predicted NEE. The dashed red lines indicate the 1:1 line.



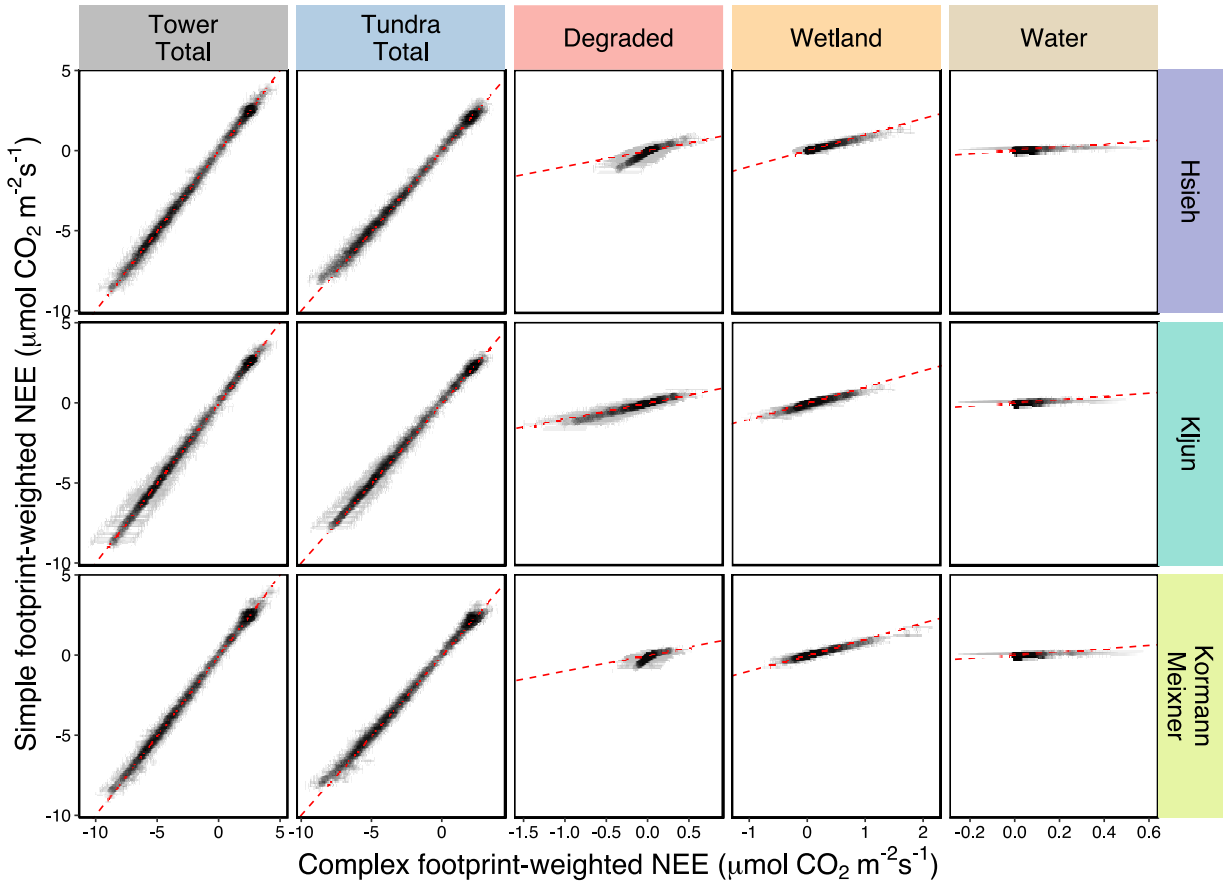

Figure S8. July 2020 median predicted net ecosystem exchange (NEE) for each landcover (simple landcover on the y-axis and complex on the x-axis) weighted by their respective footprint influence. The top row shows NEE predicted with and weighted by footprint influence from Hsieh model, the middle row uses Kljun footprint influence, and the bottom row uses footprint influence from Kormann & Meixner. The leftmost column shows tower total NEE, the linear combination of each predicted NEE weighted by its footprint influence. The next column shows tundra total NEE, the linear combination of lichen tundra, shrub tundra, sedge tundra, and tundra at the edge of degrading permafrost from the complex footprint-weighted NEE on the x-axis, compared to the simple map tundra footprint-weighted NEE on the y-axis. The columns continue with footprint-weighted NEE comparisons for fen, degraded permafrost, and surface water. The error bars show the inter-quartile range on predicted NEE. The dashed red lines indicate the 1:1 line.

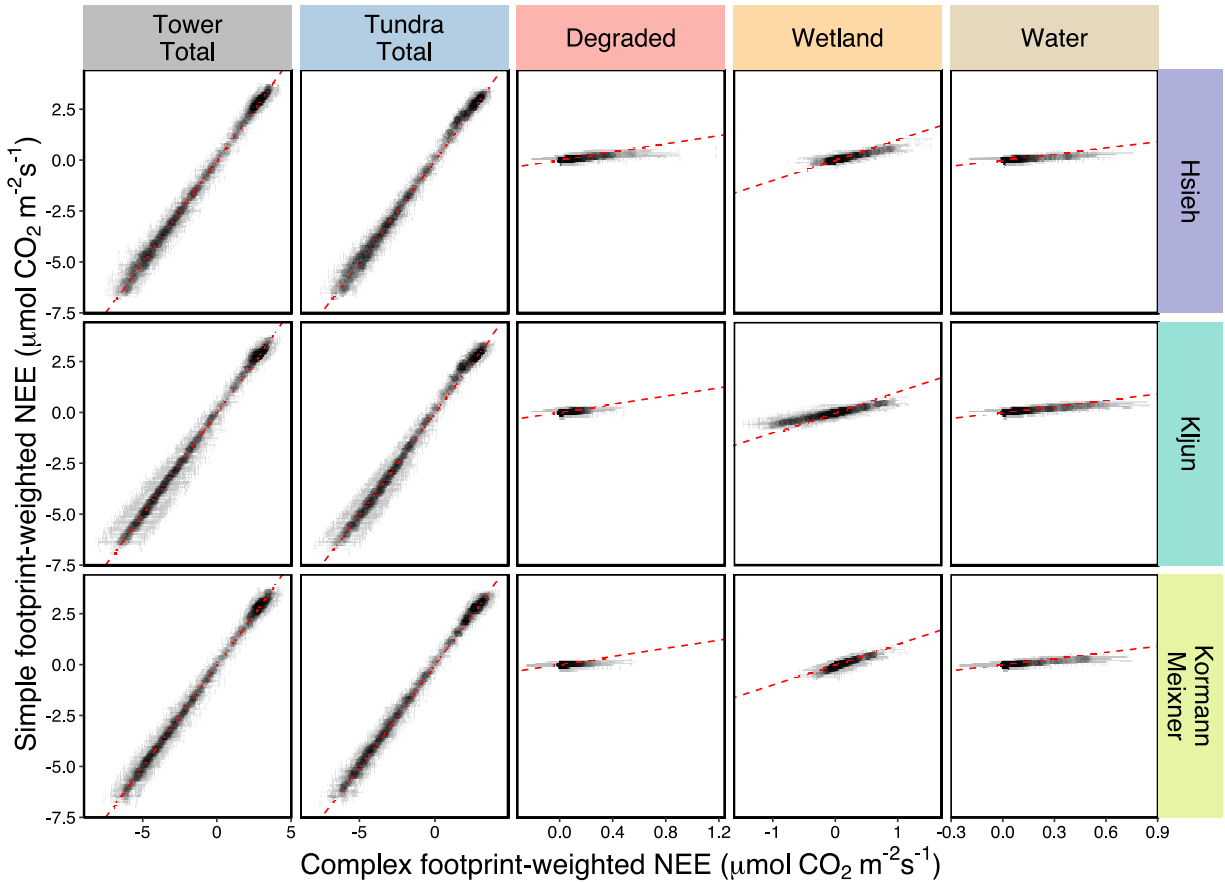

Figure S9. August 2020 median predicted net ecosystem exchange (NEE) for each landcover (simple landcover on the y-axis and complex on the x-axis) weighted by their respective footprint influence. The top row shows NEE predicted with and weighted by footprint influence from Hsieh model, the middle row uses Kljun footprint influence, and the bottom row uses footprint influence from Kormann & Meixner. The leftmost column shows tower total NEE, the linear combination of each predicted NEE weighted by its footprint influence. The next column shows tundra total NEE, the linear combination of lichen tundra, shrub tundra, sedge tundra, and tundra at the edge of degrading permafrost from the complex footprint-weighted NEE on the x-axis, compared to the simple map tundra footprint-weighted NEE on the y-axis. The columns continue with footprint-weighted NEE comparisons for fen, degraded permafrost, and surface water. The error bars show the inter-quartile range on predicted NEE. The dashed red lines indicate the 1:1 line.

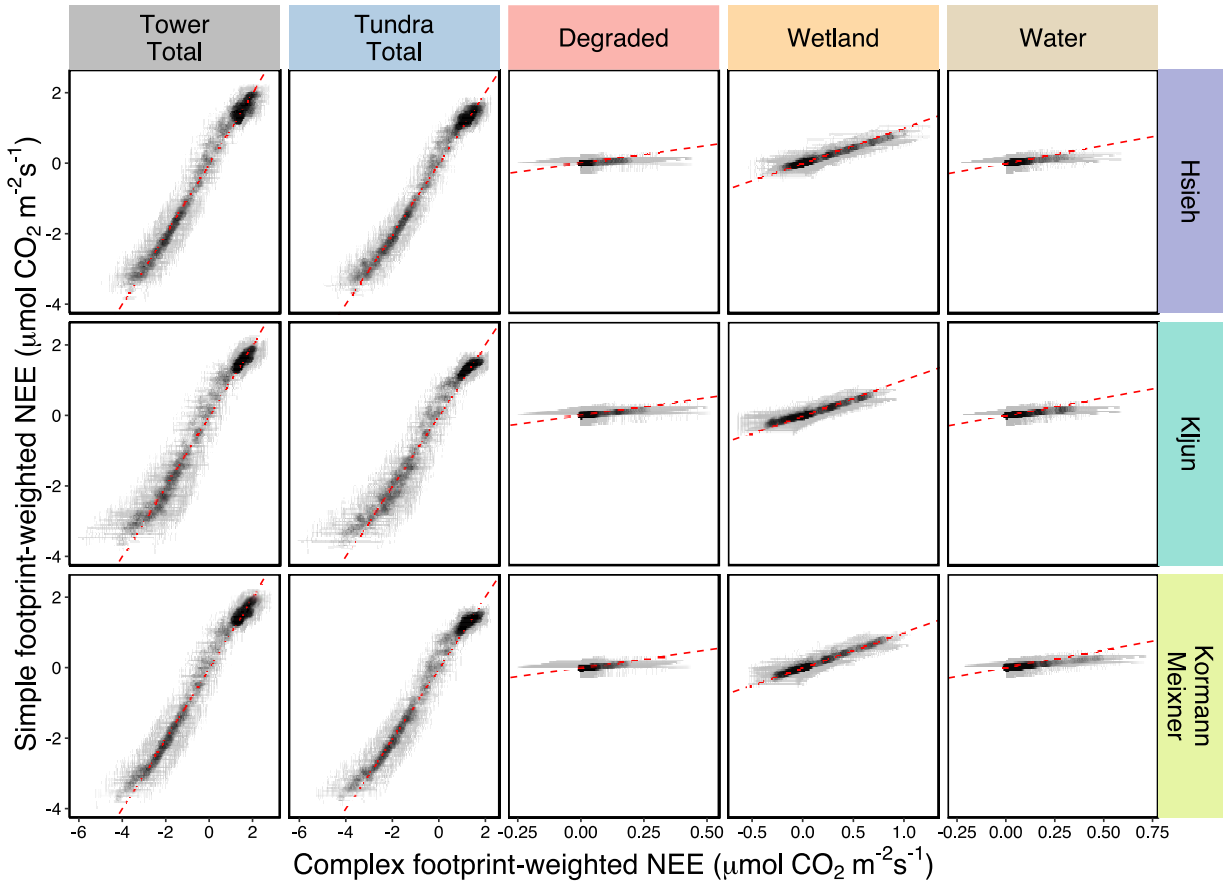

Figure S10. September 2020 median predicted net ecosystem exchange (NEE) for each landcover (simple landcover on the y-axis and complex on the x-axis) weighted by their respective footprint influence. The top row shows NEE predicted with and weighted by footprint influence from Hsieh model, the middle row uses Kljun footprint influence, and the bottom row uses footprint influence from Kormann & Meixner. The leftmost column shows tower total NEE, the linear combination of each predicted NEE weighted by its footprint influence. The next column shows tundra total NEE, the linear combination of lichen tundra, shrub tundra, sedge tundra, and tundra at the edge of degrading permafrost from the complex footprint-weighted NEE on the x-axis, compared to the simple map tundra footprint-weighted NEE on the y-axis. The columns continue with footprint-weighted NEE comparisons for fen, degraded permafrost, and surface water. The error bars show the inter-quartile range on predicted NEE. The dashed red lines indicate the 1:1 line.

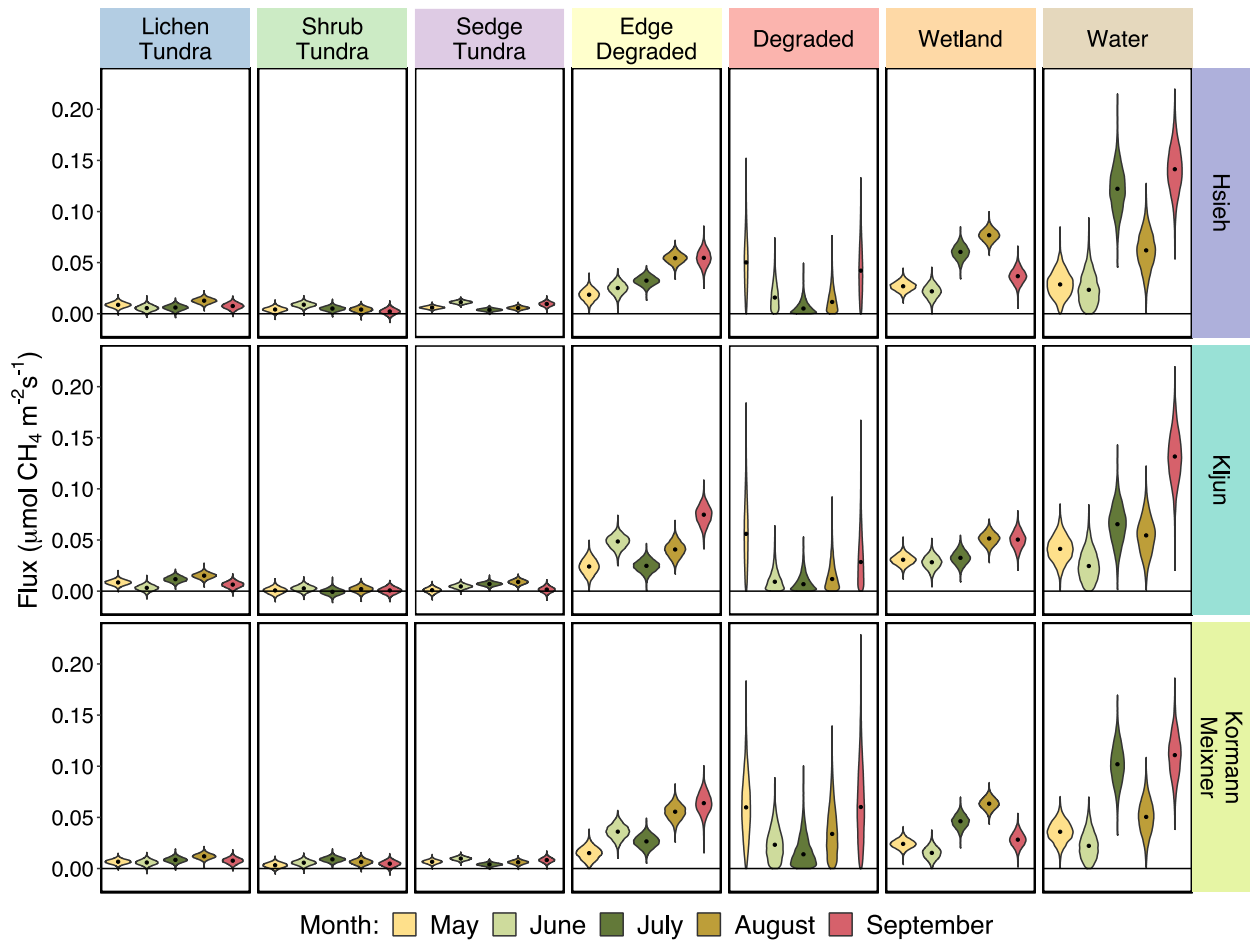

Figure S11. Monthly 2020 violin plots of CH<sub>4</sub> fluxes by landcovers (columns) for each footprint model (rows). Distributions for violin plots are derived from posterior distributions of predicted CH<sub>4</sub>. Black dots indicate medians.

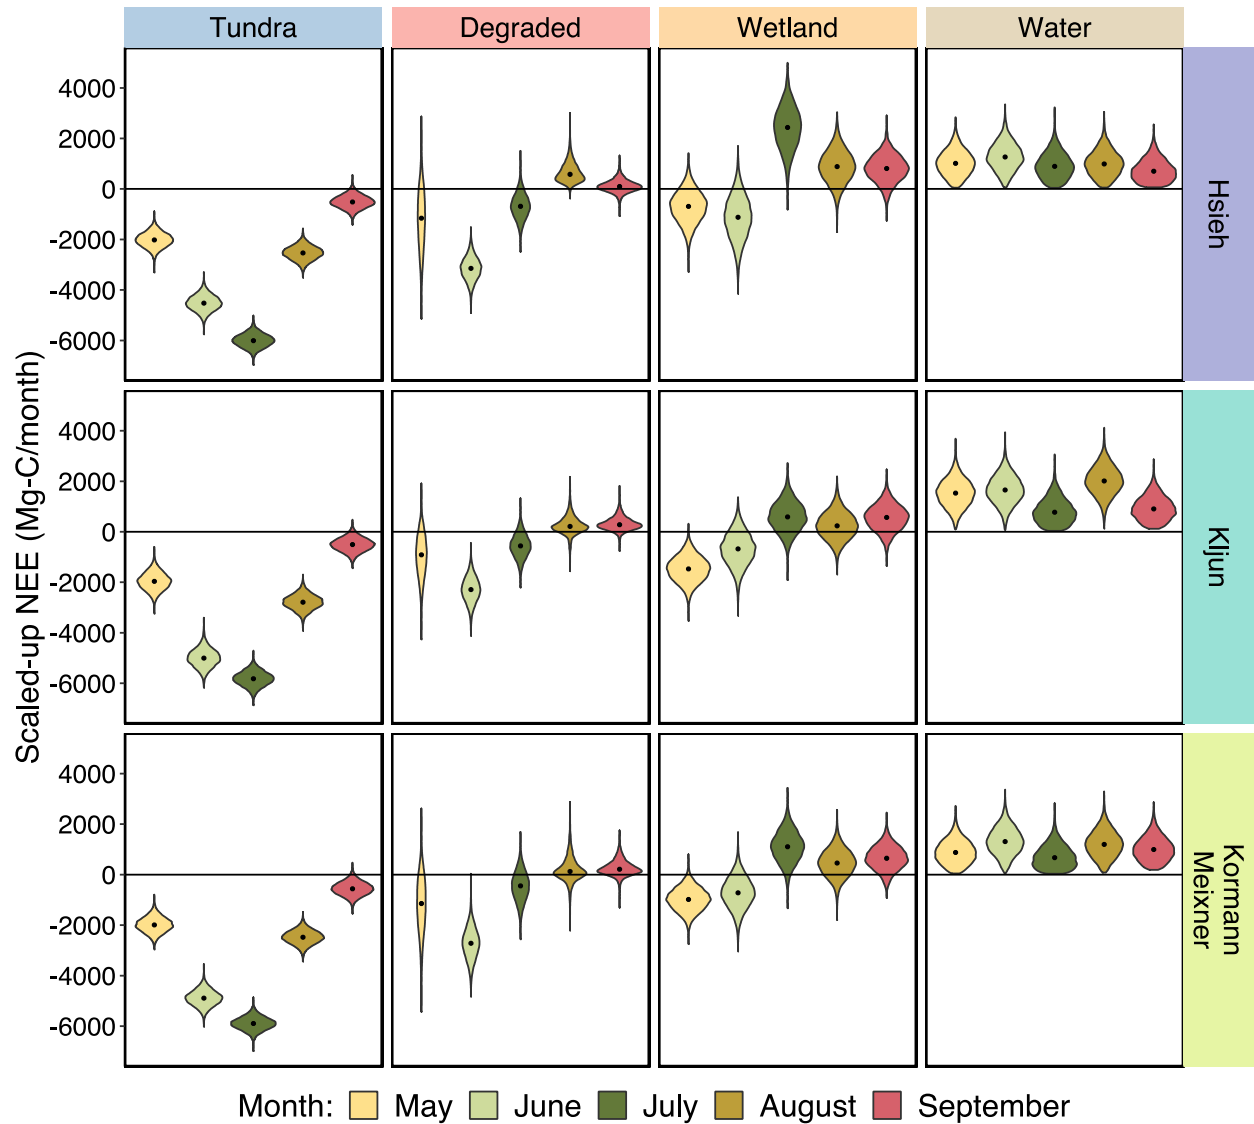

Figure S12. Monthly violin plots of 2020 growing season NEE carbon budgets by landcovers (columns) in the simple map for each footprint model (rows). Distributions for violin plots are derived from posterior distributions of predicted NEE fluxes scaled by their landcover areas in figure 1. Black dots indicate medians. Monthly scaled-up carbon budgets for landcovers using the complex map can be found in the main text (Fig 5).
